# Supplementary material for: Sodium-Calcium Exchanger 2: A Pivotal Role in Oxaliplatin Induced Peripheral Neurotoxicity and Axonal Damage?
Source: MDPI journal article supplement (doi:10.3390/ijms231710063), 2022-09-02
Supplement: s1 [file s1]

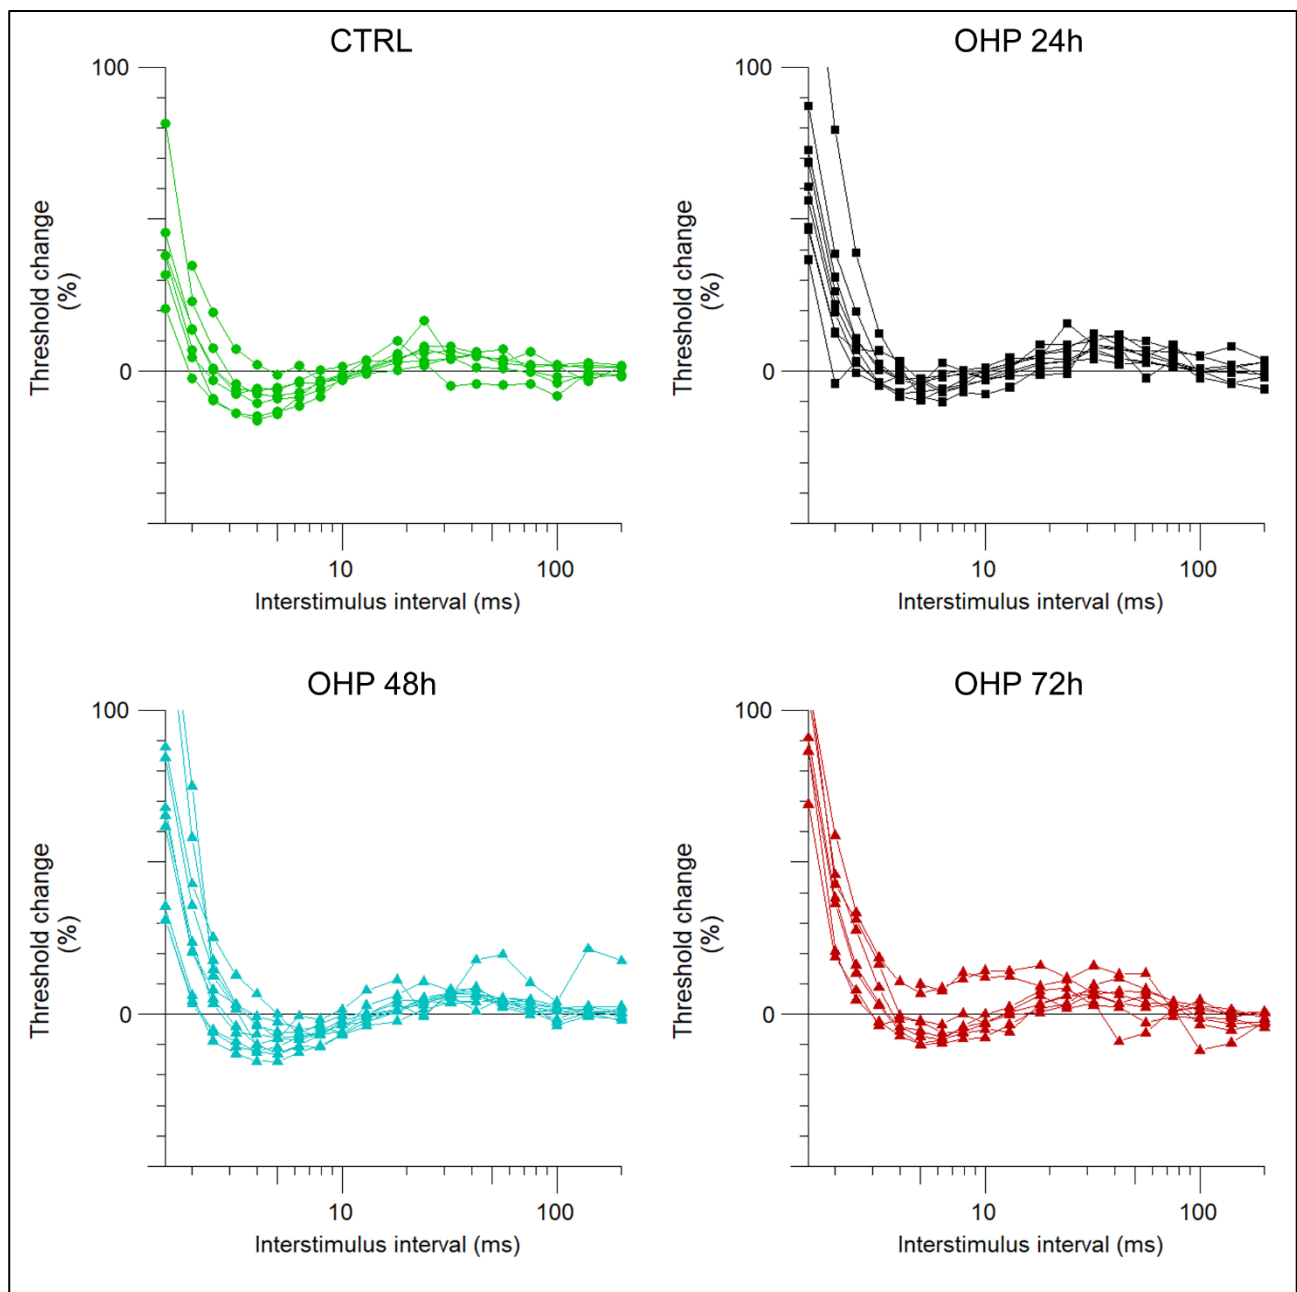

**Supplementary Figure S1.** Exemplificative traces of single recordings for each group are shown (recovery cycle of nerve excitability testing). CTRL: control group; OHP: oxaliplatin.
